# Supplementary material
Source: PubMed Central journal article supplement (PMC7298580)
Supplement: Hauck_SupplementaryMaterial.pdf [file Hauck_SupplementaryMaterial.pdf]

## SUPPLEMENTARY ONLINE INFORMATION

### Mortality and revascularization among myocardial infarction patients with schizophrenia: a population-based cohort study

\*Tanya S. Hauck MD PhD

Centre for Addiction and Mental Health, Department of Psychiatry, Institute of Health Policy Management and Evaluation, University of Toronto

T: (416) 535-8501 x34394

tanya.hauck@camh.ca

Centre for Addiction & Mental Health

33 Russell St, T306

Toronto, ON, M5S 2S1

Ning Liu MSc

Institute of Health Policy Management and Evaluation, University of Toronto; ICES

Harindra C. Wijeyesundera MD PhD

Schulich Heart Centre, Sunnybrook Health Sciences Centre, Sunnybrook Research Institute, Department of Medicine & Institute of Health Policy, Management and Evaluation, University of Toronto; ICES

Paul Kurdyak MD PhD

Centre for Addiction and Mental Health, Department of Psychiatry and Institute for Health Policy, Management and Evaluation, University of Toronto; ICES

**SUPPLEMENTARY FIGURE 1** Cumulative probability of receiving procedures in patients with and without schizophrenia. (A) Cardiac catheterization (B) PCI (C) CABG and (D) PCI or CABG.

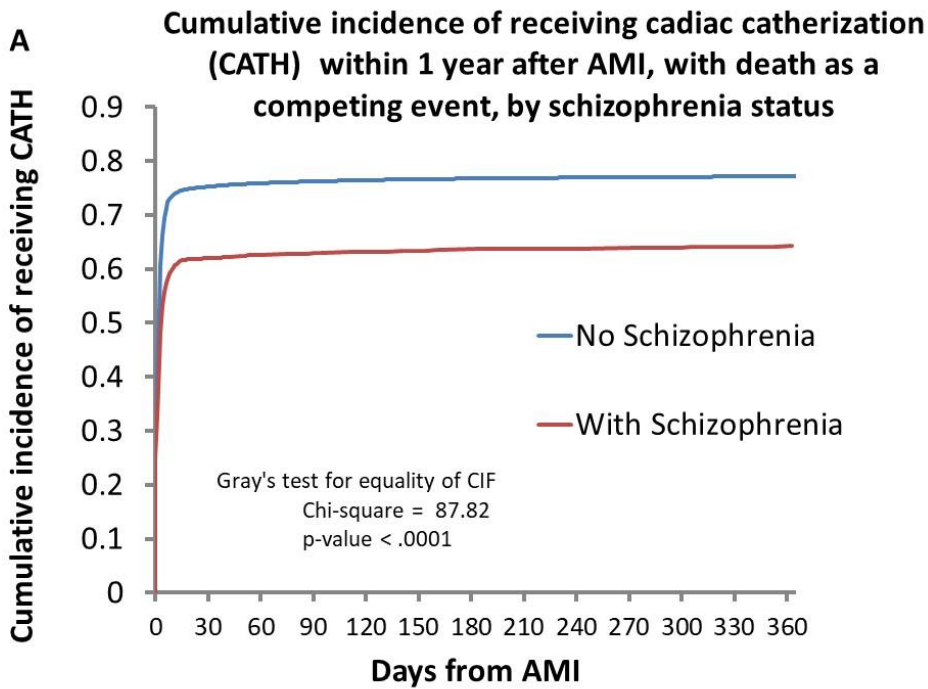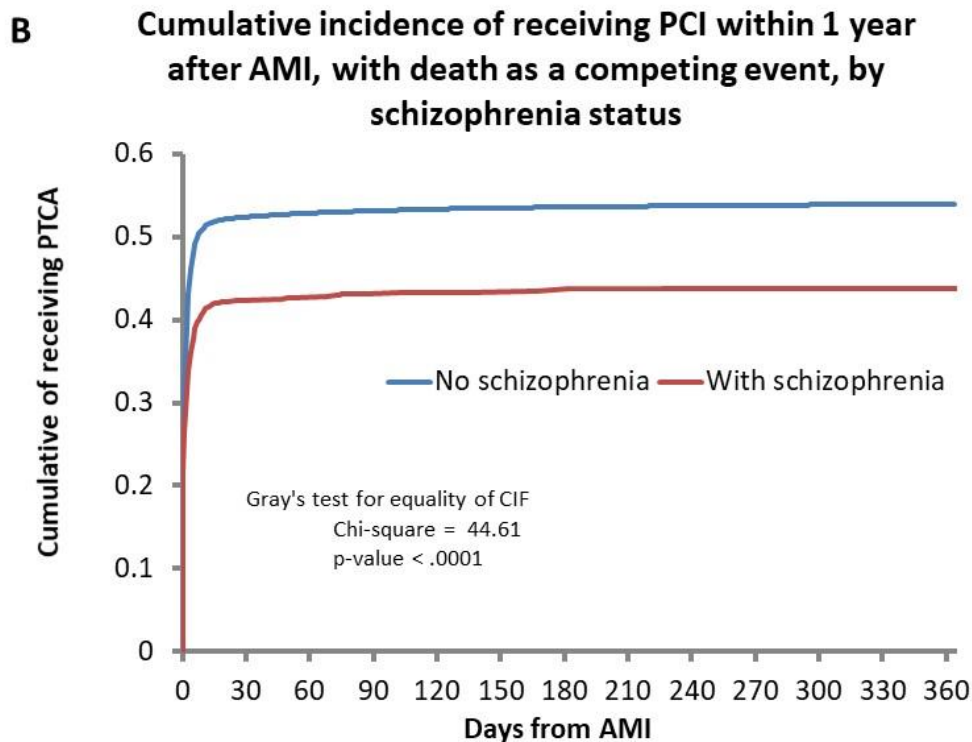

**C** Cumulative incidence of receiving CABG within 1 year after AMI, with death as a competing event, by schizophrenia status

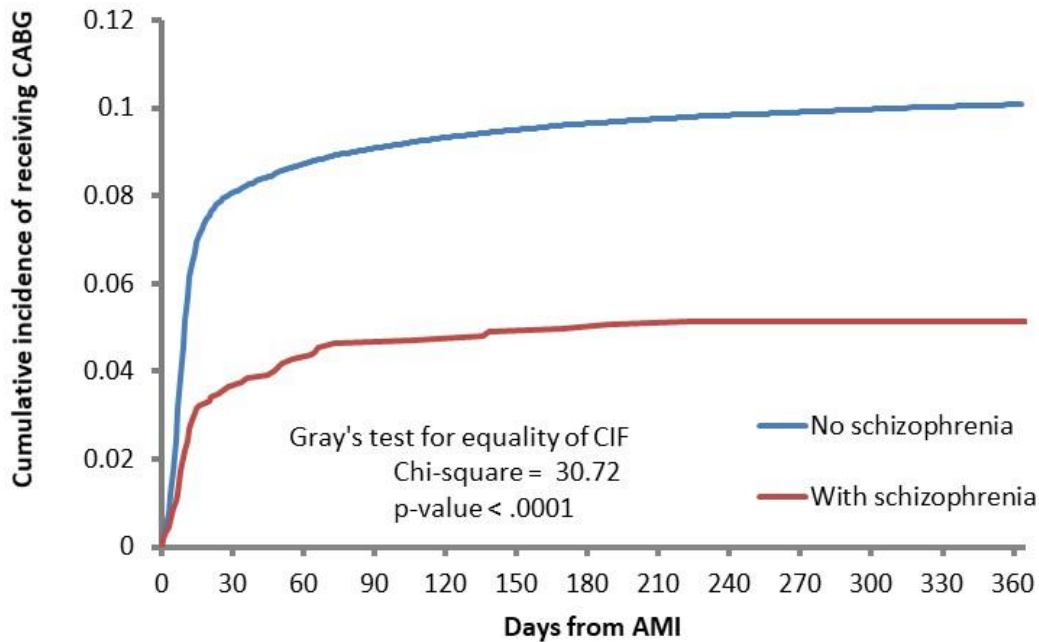

**D** Cumulative incidence of receiving CABG or PCI within 1 year after AMI, with death as a competing event, by schizophrenia status

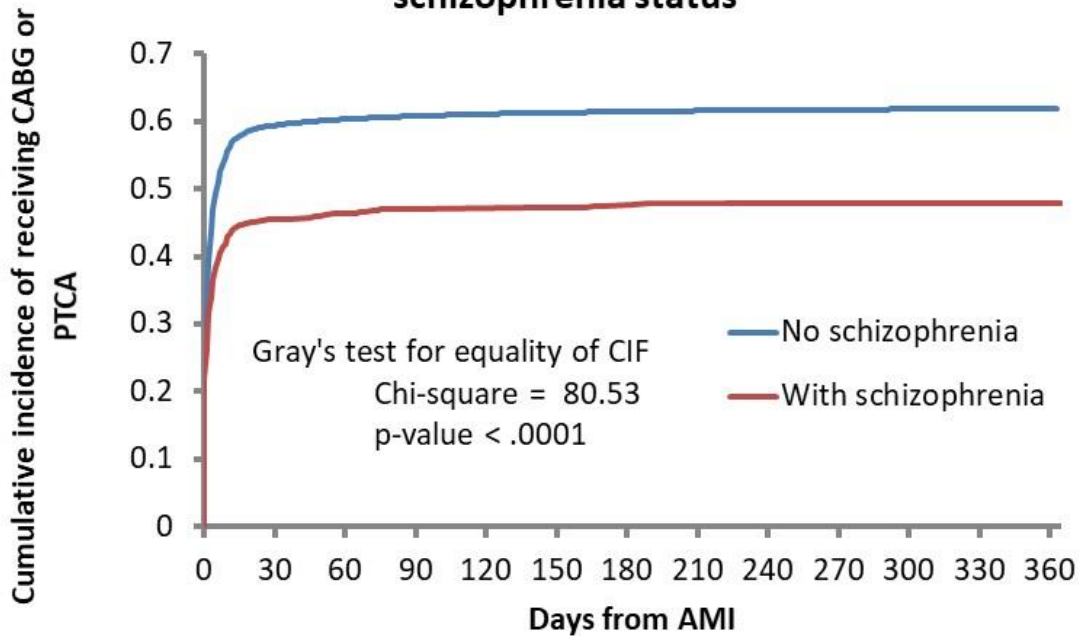

**SUPPLEMENTARY TABLE 1: Secondary outcomes.**

| <b>Second AMI</b>                                       | <b>No schizophrenia<br/>(N=107,465)</b> | <b>Schizophrenia<br/>(N=1,145)</b> | <b>P</b> |
|---------------------------------------------------------|-----------------------------------------|------------------------------------|----------|
| 2nd AMI within 365 days from the index AMI †            | 6,107 (5.7%)                            | 69 (6.0%)                          | 0.618    |
| <b>Length of stay during the index AMI care episode</b> |                                         |                                    |          |
| Mean ± SD                                               | 7.53 ± 12.14                            | 8.12 ± 11.81                       | 0.104    |
| Median (IQR)                                            | 4 (3-8)                                 | 5 (3-9)                            | 0.003    |

**SUPPLEMENTARY TABLE 2: Medication prescriptions in individuals with and without schizophrenia.**

| <b>VARIABLE</b>                                     | <b>No<br/>schizophrenia</b> | <b>With<br/>schizophrenia</b> | <b>TOTAL</b>   | <b>p-VALUE</b> |
|-----------------------------------------------------|-----------------------------|-------------------------------|----------------|----------------|
|                                                     | N=61,915                    | N=540                         | N=62,455       |                |
| <b>Within 3 months after AMI<br/>discharge date</b> |                             |                               |                |                |
| Received ACE                                        | 33,186 (53.6%)              | 269 (49.8%)                   | 33,455 (53.6%) | 0.079          |
| Received ARB                                        | 10,270 (16.6%)              | 57 (10.6%)                    | 10,327 (16.5%) | <.001          |
| Received Beta blocker                               | 42,235 (68.2%)              | 326 (60.4%)                   | 42,561 (68.1%) | <.001          |
| Received Statins                                    | 47,072 (76.0%)              | 361 (66.9%)                   | 47,433 (75.9%) | <.001          |
| Received any of these 4 drugs                       | 52,500 (84.8%)              | 420 (77.8%)                   | 52,920 (84.7%) | <.001          |
| <b>Within 1 year after AMI<br/>discharge date</b>   |                             |                               |                |                |
| Received ACE                                        | 35,459 (57.3%)              | 285 (52.8%)                   | 35,744 (57.2%) | 0.036          |
| Received ARB                                        | 12,862 (20.8%)              | 69 (12.8%)                    | 12,931 (20.7%) | <.001          |
| Received Beta blocker                               | 44,340 (71.6%)              | 339 (62.8%)                   | 44,679 (71.5%) | <.001          |
| Received Statins                                    | 48,697 (78.7%)              | 380 (70.4%)                   | 49,077 (78.6%) | <.001          |
| Received any of these 4 drugs                       | 53,083 (85.7%)              | 428 (79.3%)                   | 53,511 (85.7%) | <.001          |

**SUPPLEMENTARY TABLE 3: Definitions of procedures and outcomes based on billing codes in administrative datasets.**

| <b>Procedure</b>        | <b>Fee Code</b>                                                                                                                                                                                                                                                                                                                                                                                                                                                                                                                                                                                                                                                                                                                                                                                                                                                                                                                                                                                                                                                                 |
|-------------------------|---------------------------------------------------------------------------------------------------------------------------------------------------------------------------------------------------------------------------------------------------------------------------------------------------------------------------------------------------------------------------------------------------------------------------------------------------------------------------------------------------------------------------------------------------------------------------------------------------------------------------------------------------------------------------------------------------------------------------------------------------------------------------------------------------------------------------------------------------------------------------------------------------------------------------------------------------------------------------------------------------------------------------------------------------------------------------------|
| Cardiac Catheterization | <b>OHIP:</b> G297, Z442<br><b>CIHI:</b> 2HZ28, 3IP10, 3IS10, 3IP10VC, 3IP10VX, 3IP10VY, 3IP10VZ, 3IS10VA, 3IS10VC, 3IS10VN, 2HZ28GPPL                                                                                                                                                                                                                                                                                                                                                                                                                                                                                                                                                                                                                                                                                                                                                                                                                                                                                                                                           |
| PCI                     | <b>OHIP:</b> Z434<br><b>CIHI:</b> 1IJ50, 1IJ57, 1IJ50GQBD, 1IJ50GQBF, 1IJ50GQNR, 1IJ50GQOA, 1IJ50GQOB, 1IJ50GQOD, 1IJ50GQOE, 1IJ50GSBD, 1IJ50GTBD, 1IJ50GTBF, 1IJ50GTOA, 1IJ50GTOB, 1IJ50GTOD, 1IJ50GTOE, 1IJ50GUBD, 1IJ50GUBF, 1IJ50GUOA, 1IJ50GUOB, 1IJ50GUOD, 1IJ50GUE, 1IJ57GQAG, 1IJ57GQAGA, 1IJ57GQAGK, 1IJ57GQAGN, 1IJ57GQBD, 1IJ57GQFV, 1IJ57GQFVA, 1IJ57GQFVK, 1IJ57GQFVN, 1IJ57GQGX, 1IJ57GQGXA, 1IJ57GQGXK, 1IJ57GQGXN, 1IJ57GQQA, 1IJ57GQOB, 1IJ57GQOBA, 1IJ57GQOBK, 1IJ57GQOBN, 1IJ57GQOC, 1IJ57GQOCA, 1IJ57GQOCK, 1IJ57GQOCN, 1IJ57GSAG, 1IJ57GSAGA, 1IJ57GSAGK, 1IJ57GSAGN, 1IJ57GSFV, 1IJ57GSFVA, 1IJ57GSFVK, 1IJ57GSFVN, 1IJ57GSGX, 1IJ57GSGXA, 1IJ57GSGXK, 1IJ57GSGXN, 1IJ57LAAG, 1IJ57LAAGA, 1IJ57LAAGK, 1IJ57LAAGN, 1IJ57LAFV, 1IJ57LAFVA, 1IJ57LAFVK, 1IJ57LAFVN, 1IJ57LAGX, 1IJ57LAGXA, 1IJ57LAGXK, 1IJ57LAGXN, 1IJ57LAOB, 1IJ57LAOBA, 1IJ57LAOBK, 1IJ57LAOBN, 1IJ57LAOC, 1IJ57LAOCA, 1IJ57LAOCK, 1IJ57LAOCN, 1IJ57VSAG, 1IJ57VSAGA, 1IJ57VSAGK, 1IJ57VSAGN, 1IJ57VSFV, 1IJ57VSFVA, 1IJ57VSFVK, 1IJ57VSFVN, 1IJ57VSGX, 1IJ57VSGXA, 1IJ57VSGXK, 1IJ57VSGXN |
| CABG                    | <b>OHIP:</b> R742, R743<br><b>CIHI:</b> 1IJ76, 1IJ76BQXXA, 1IJ76DAXXA, 1IJ76DAXXG, 1IJ76DAXXN, 1IJ76DAXXQ, 1IJ76LAXXA, 1IJ76LAXXG, 1IJ76LAXXN, 1IJ76LAXXQ, 1IJ76WKXXA, 1IJ76WKXXG, 1IJ76WKXXN, 1IJ76WKXXQ                                                                                                                                                                                                                                                                                                                                                                                                                                                                                                                                                                                                                                                                                                                                                                                                                                                                       |
| Second MI               | Hospitalization with most responsible diagnosis as I21 or I22                                                                                                                                                                                                                                                                                                                                                                                                                                                                                                                                                                                                                                                                                                                                                                                                                                                                                                                                                                                                                   |

OHIP: Ontario Health Insurance Plan

CIHI: Canadian Institute of Health Information
